# Supplementary material
Source: Springer Nature journal article supplement (https://www.springermedizin.de/resource/supplementary/12889_2007_1188_MOESM4_ESM.pdf/9502646)
Supplement: MOESM4 [file 9502646]

Boys' rank for smoking rates - the lower the rank the better the school is performing re: lower smoking rates

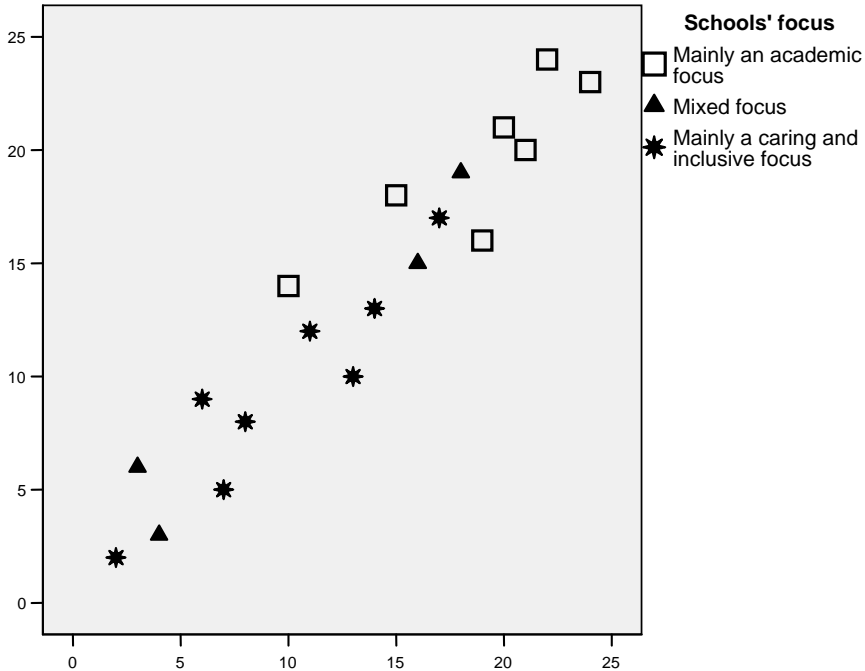

Girls' rank for smoking rates - the lower the rank the better the school is performing re: lower smoking rates
